# Supplementary material for: Nontargeted detection and recognition of adulterants in milk powder using Raman imaging and neural networks
Source: Royal Society of Chemistry journal article supplement (doi:10.1039/d2an01540d), 2022-12-07
Supplement: d2an01540d1.pdf [file d2an01540d1.pdf]

**Table S1.** Adulteration patterns and compositions of in-homogeneously adulterated milk powder samples.

| patter<br>n | adulterant           | concentration<br>(w/w) |
|-------------|----------------------|------------------------|
| A           | melamine             | 0.3%                   |
| B           | urea                 | 0.3%                   |
| C           | starch               | 0.3%                   |
| D           | whey                 | 0.3%                   |
| E           | maltodextrin         | 0.3%                   |
| F           | melamine /<br>starch | 0.1% / 0.2%            |
| H           | urea / whey          | 0.1% / 0.2%            |

**Table S2.** The ADNN net structure in single-point mode.

| generator                 | discriminator                                            |
|---------------------------|----------------------------------------------------------|
| Conv_1d (1,1,7) + Relu    | Conv_1d (1,1,7) +<br>Relu                                |
| Conv_1d (1,3,7) + Relu    | Conv_1d (1,3,7) +<br>Relu                                |
| Conv_1d (3,6,3) + Relu    | Conv_1d (3,6,3) +<br>Relu                                |
| Conv_1d (6,1,1) +<br>Tanh | Conv_1d (6,1,3) +<br>Relu<br>Linear<br>Linear<br>Sigmoid |

**Table S3.** The ADNN net structure in segmentation mode.

| generator                | discriminator                                                                   |
|--------------------------|---------------------------------------------------------------------------------|
| Conv_2d (1,1,3,3) + Relu | Conv_2d (1,1,3,3) + Relu                                                        |
| Conv_2d (1,3,3,3) + Relu | Conv_2d (1,3,3,3) + Relu                                                        |
| Conv_2d (3,6,1,3) + Relu | Conv_2d (3,1,3,3) + Relu                                                        |
| Conv_2d (6,1,1,1) + Tanh | MaxPooling<br>Conv_1d (1,1,3)<br>Conv_1d (1,1,3)<br>Linear<br>Linear<br>Sigmoid |
